# Supplementary material for: Fine roots of Prosopis flexuosa trees in the field. Plant and soil variables that control their growth and depth distribution
Source: Springer Nature journal article supplement (doi:10.1007/s11258-018-0889-0), 2018-10-15
Supplement: 11258_2018_889_MOESM1_ESM.pdf [file 11258_2018_889_MOESM1_ESM.pdf]

## Plant Ecology

### **Fine roots of *Prosopis flexuosa* trees in the field. Plant and soil variables that control their growth and depth distribution.**

Guevara Aranzazú<sup>1,2</sup>, Pancotto Verónica<sup>3</sup>, Mastrantonio Leandro<sup>4</sup> and Giordano Carla Valeria<sup>5\*</sup>

<sup>1</sup>Instituto de Bio y Geociencias del NOA (IBIGEO), CONICET, UNSA, Avenida 9 de julio 14 (4405), Rosario de Lerma, Salta, Argentina.

<sup>2</sup>Facultad de Ciencias Naturales, UNSA. Sede Regional Orán. Rudecindo Alvarado 751 (4530), San Ramón de la Nueva Orán, Salta, Argentina.

<sup>3</sup>Centro Austral de Investigaciones Científicas (CADIC) CONICET, UNTDF, Bernardo Houssay 200, Ushuaia, Tierra del Fuego, Argentina.

<sup>4</sup>Facultad de Ciencias Agrarias, UNCUYO. Almirante Brown 500, Chacras de Coria, CP (5519), Mendoza, Argentina.

<sup>5</sup>Instituto Argentino de Investigaciones en Zonas Áridas (IADIZA), CONICET, UNCUYO. Av. Ruiz Leal s/n, Parque General San Martín, CP (5500), Mendoza, Argentina.

\* Corresponding author. Phone: + 54 261 5244163. E- mail: [cgiordano@mendoza-conicet.gob.ar](mailto:cgiordano@mendoza-conicet.gob.ar).

**ORCID ID:** <https://orcid.org/0000-0001-7298-9725>

## Online Resource 1

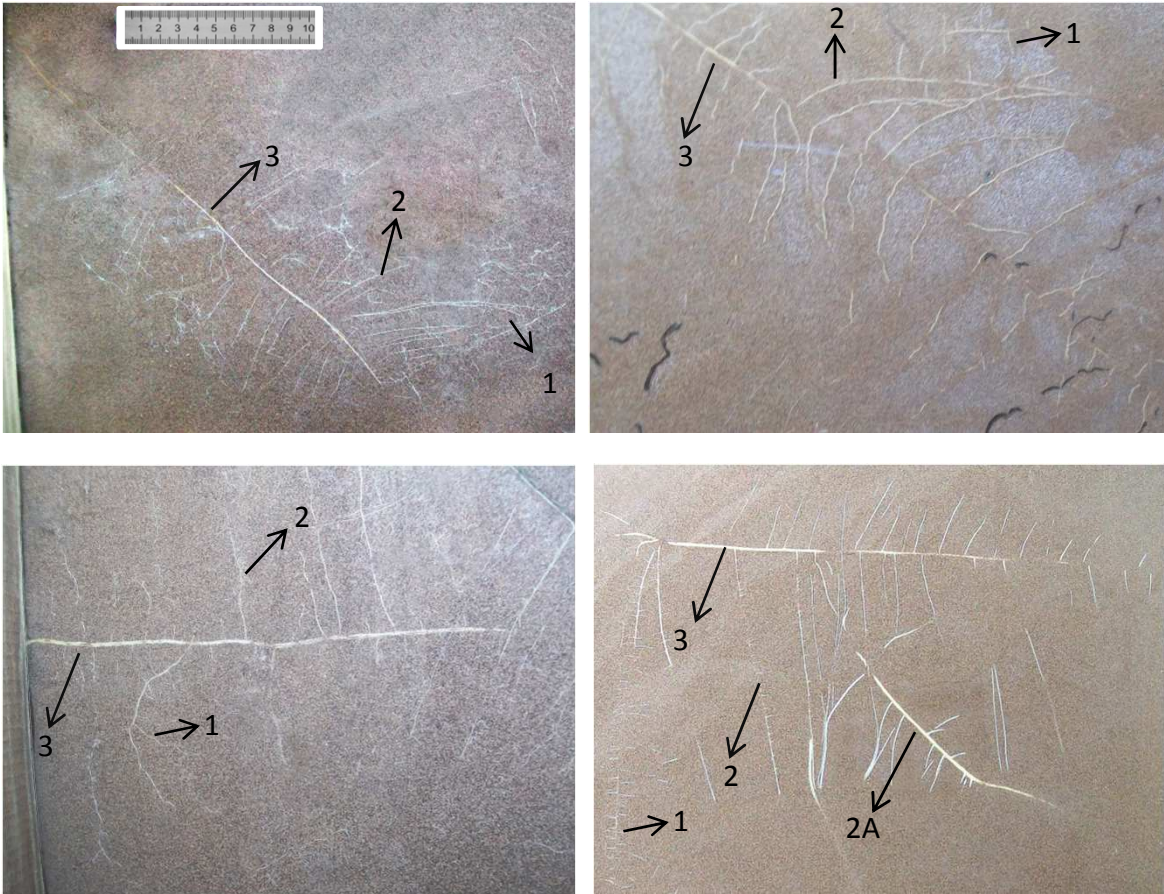

Photographs of representative roots seen through rhizotron windows. First, second and third order branching are indicated with numbers 1, 2, and 3 respectively. A secondary axis with the tree-branching order pattern is indicated as 2A.

Online Resource 2

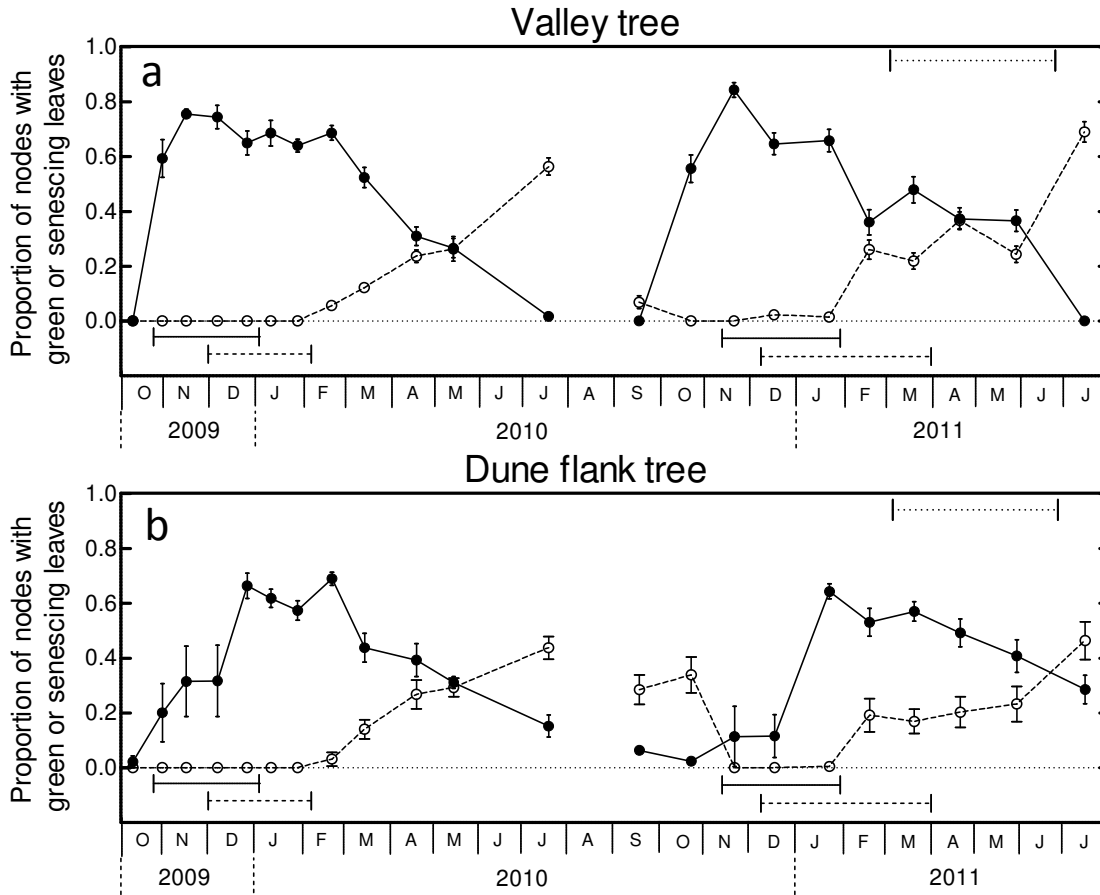

Crown phenology of every selected phreatophyte tree in the valley (a) and non-phreatophyte tree on the dune flank (b). The graphics shows tree crown development (grey closed circles, full line), leaf senescence (open circles, dashed lines), flowering (full bar below) and fruiting (dashed bar below). The period when *Colias lesbia* attack caused tree defoliation is indicated with the dotted line above each graphics. Symbols are means  $\pm 1$  s. e. m.
